# Supplementary material
Source: Springer Nature journal article supplement (https://www.springermedizin.de/resource/supplementary/12889_2011_3184_MOESM6_ESM.PDF/9488330)
Supplement: MOESM6 [file 9488330]

**Additional File 6. Description of Interventions Demonstrating Positive Effect on Presenteeism (n = 10) [in alphabetical order]**

| STUDY                 | INTERVENTION                                                                                                                                                                                                                                                                                                                                                                                                                                                                                                                                                                                                                                                                                                                                                                                   | OTHER COMPONENTS                                                                                                                                                                   |
|-----------------------|------------------------------------------------------------------------------------------------------------------------------------------------------------------------------------------------------------------------------------------------------------------------------------------------------------------------------------------------------------------------------------------------------------------------------------------------------------------------------------------------------------------------------------------------------------------------------------------------------------------------------------------------------------------------------------------------------------------------------------------------------------------------------------------------|------------------------------------------------------------------------------------------------------------------------------------------------------------------------------------|
| Block et al., 2008    | <p><i>Alive!</i> (A Lifestyle Intervention via Email)<br/> <b>GOAL:</b> To improve diet &amp; physical activity (PA) through behaviour change.</p> <ul style="list-style-type: none"> <li>• <i>Lifestyle &amp; Barriers Questionnaires</i> used to tailor intervention.</li> <li>• Participants chose 1 module to work on for 4 months: (a) ↑ PA, (b) ↑ fruits &amp; vegetables, or (c) ↓ fats &amp; sugars.</li> <li>• Received weekly messages of small-step goals to choose from; mid-week messages served as goal reminders.</li> <li>• After choosing goal, taken to “personal home page”: tips for achieving goals, addressing barriers, chat room, additional links, etc.</li> <li>• Easy to use; tailoring based on <i>behaviour change model &amp; stickiness</i> concept.</li> </ul> | <p><b>DELIVERY METHOD:</b> email<br/> <b>SUBJECTS SCREENED?</b> yes, via health risk assessment (HRA)<br/> <b>TAILORED?</b> yes<br/> <b>INCENTIVES?</b> no</p>                     |
| Dababneh et al., 2001 | <p>Two different rest break schedules tested on same group: (i) 12 3-min breaks, (ii) 4 9-min breaks.<br/> <b>GOAL:</b> To improve productivity &amp; well-being.</p> <ul style="list-style-type: none"> <li>• Received 36-min extra rest break time.</li> <li>• 2 weeks per rest break schedule (separated by 1-wk interval).</li> <li>• Could do whatever they liked during breaks.</li> <li>• Longer breaks allowed workers to attend to their physical needs (e.g., restroom break) without interrupting group production.</li> </ul>                                                                                                                                                                                                                                                      | <p><b>DELIVERY METHOD:</b> organization change<br/> <b>SUBJECTS SCREENED?</b> no<br/> <b>TAILORED?</b> no<br/> <b>INCENTIVES?</b> no</p>                                           |
| de Boer et al., 2004  | <p>Occupational health program<br/> <b>GOAL:</b> To improve work ability &amp; quality of life; prevent early retirement.</p> <ul style="list-style-type: none"> <li>• ≥ 3 consultations between employee &amp; occupational physician (OP).</li> <li>• OP explored health, work-related, &amp; social/psychological factors.</li> <li>• Multidisciplinary: collaborated with supervisors/managers, GP, medical specialist, or psychologist.</li> <li>• Involved changing work tasks, extra tools/aids, improvement in work relations, etc.</li> </ul>                                                                                                                                                                                                                                         | <p><b>DELIVERY METHOD:</b> workers’ own OP, in collaboration with supervisors/managers<br/> <b>SUBJECTS SCREENED?</b> yes<br/> <b>TAILORED?</b> yes<br/> <b>INCENTIVES?</b> no</p> |
| Mills et al., 2007    | <p>Low-cost multi-component health promotion<br/> <b>GOAL:</b> To ↓ health risks; ↑ work productivity &amp; performance.</p> <ul style="list-style-type: none"> <li>• 12 months</li> <li>• Advice tailored to level of readiness to change health-related behaviours.</li> <li>• Unlimited access to personalized health web</li> </ul>                                                                                                                                                                                                                                                                                                                                                                                                                                                        | <p><b>DELIVERY METHOD:</b> email, paper packages, seminars<br/> <b>SUBJECTS SCREENED?</b> yes (HRA)<br/> <b>TAILORED?</b> yes<br/> <b>INCENTIVES?</b> yes (lottery tickets)</p>    |

|                       |                                                                                                                                                                                                                                                                                                                                                                                                                                                                                                                                                                                                                                                                                                                                                                |                                                                                                                                                                                                                                                                                                                  |
|-----------------------|----------------------------------------------------------------------------------------------------------------------------------------------------------------------------------------------------------------------------------------------------------------------------------------------------------------------------------------------------------------------------------------------------------------------------------------------------------------------------------------------------------------------------------------------------------------------------------------------------------------------------------------------------------------------------------------------------------------------------------------------------------------|------------------------------------------------------------------------------------------------------------------------------------------------------------------------------------------------------------------------------------------------------------------------------------------------------------------|
|                       | <p>portal that included interactive online behaviour-change programs.</p> <ul style="list-style-type: none"> <li>Received tailored emails bimonthly on wellness topics relevant to them.</li> <li>Received 4 on-site seminars based upon 4 most prevalent health risks.</li> </ul>                                                                                                                                                                                                                                                                                                                                                                                                                                                                             |                                                                                                                                                                                                                                                                                                                  |
| Nurminen et al., 2002 | <p>Worksite exercise</p> <p><b>GOAL:</b> To improve work ability; ↓ sick leaves.</p> <ul style="list-style-type: none"> <li>8 months</li> <li>Received personal prescription for exercise &amp; counselling by PT, to ↑ self-directed PA during leisure time.</li> <li>60-min group worksite exercise sessions 1x/wk.</li> </ul>                                                                                                                                                                                                                                                                                                                                                                                                                               | <p><b>DELIVERY METHOD:</b> physiotherapist (PT), occupational health nurse (OHN)</p> <p><b>SUBJECTS SCREENED?</b> no</p> <p><b>TAILORED?</b> yes</p> <p><b>INCENTIVES?</b> no</p>                                                                                                                                |
| Rivilis et al., 2006  | <p>Participatory ergonomic (PE) intervention</p> <p><b>GOAL:</b> To improve musculoskeletal (MSK) health.</p> <ul style="list-style-type: none"> <li>14 months</li> <li>ECT had 4 training sessions re: ergonomic principles, assessments/measurements, identification &amp; management of workplace risk factors.</li> <li>Iterative process; progressed according to PE Blueprint (i.e., identification, assessment, solution building &amp; testing, implementation).</li> <li>14 changes implemented (e.g. new tools, workstation modifications).</li> <li>Considered physical &amp; psychosocial stressors.</li> <li>Changed work organizational factors (in addition to physical demands).</li> <li>Open forum for workers to voice concerns.</li> </ul> | <p><b>DELIVERY METHOD:</b> <i>Ergonomic Change Team (ECT)</i>: workers, unit manager, administrative assistant, human resource manager, corporate health &amp; safety regional manager, ergonomic facilitator.</p> <p><b>SUBJECTS SCREENED?</b> yes</p> <p><b>TAILORED?</b> yes</p> <p><b>INCENTIVES?</b> no</p> |
| Takao et al., 2006    | <p>Job stress education for supervisors</p> <p><b>GOAL:</b> To improve subordinates' psychological distress &amp; job performance.</p> <ul style="list-style-type: none"> <li>3 months</li> <li>Single-session, 60-min education program re: early awareness of mental problems, return-to-work support, subordinate consultations, work environment improvements, self-care recommendations.</li> <li>120-min 'Active Listening Training' with role-playing.</li> </ul>                                                                                                                                                                                                                                                                                       | <p><b>DELIVERY METHOD:</b> OP, psychologists</p> <p><b>SUBJECTS SCREENED?</b> no</p> <p><b>TAILORED?</b> no</p> <p><b>INCENTIVES?</b> no</p>                                                                                                                                                                     |
| Tsutsumi et al., 2009 | <p>Participatory intervention</p> <p><b>GOAL:</b> To improve mental health &amp; job performance.</p> <ul style="list-style-type: none"> <li>12 months</li> <li>Meetings held with human resource personnel (HR) to discuss work environment improvements.</li> <li>Facilitators (HR, factory chief) &amp; supervisors</li> </ul>                                                                                                                                                                                                                                                                                                                                                                                                                              | <p><b>DELIVERY METHOD:</b> participatory</p> <p><b>SUBJECTS SCREENED?</b> yes (stress surveillance, risk evaluation)</p> <p><b>TAILORED?</b> yes</p> <p><b>INCENTIVES?</b> no</p>                                                                                                                                |

|                    |                                                                                                                                                                                                                                                                                                                                                                                                                                                                                                                                                                                                                                                                                                                                                                                                                                                         |                                                                                                                                                                                                      |
|--------------------|---------------------------------------------------------------------------------------------------------------------------------------------------------------------------------------------------------------------------------------------------------------------------------------------------------------------------------------------------------------------------------------------------------------------------------------------------------------------------------------------------------------------------------------------------------------------------------------------------------------------------------------------------------------------------------------------------------------------------------------------------------------------------------------------------------------------------------------------------------|------------------------------------------------------------------------------------------------------------------------------------------------------------------------------------------------------|
|                    | <p>trained re: workplace mental health.</p> <ul style="list-style-type: none"> <li>Workers trained on hazard identification; used checklists to implement workplace improvements.</li> <li>Facilitators supported &amp; sustained employee autonomous activities.</li> <li>Follow-up evaluations: to address barriers &amp; suggest solutions</li> <li>Team-based, problem-solving approach based on employee involvement, shared work-related goals, &amp; action planning.</li> </ul>                                                                                                                                                                                                                                                                                                                                                                 |                                                                                                                                                                                                      |
| Viola et al., 2008 | <p>Blue-enriched white light</p> <p><b>GOAL:</b> To investigate its effects on job performance &amp; alertness.</p> <ul style="list-style-type: none"> <li>4 wks per lighting condition (white vs. blue light).</li> <li>Exposed during workday hours.</li> </ul>                                                                                                                                                                                                                                                                                                                                                                                                                                                                                                                                                                                       | <p><b>DELIVERY METHOD:</b> workplace physical environmental change</p> <p><b>SUBJECTS SCREENED?</b> no</p> <p><b>TAILORED?</b> no</p> <p><b>INCENTIVES?</b> no</p>                                   |
| Wang et al., 2007  | <p>Structured depression outreach-treatment telephone program</p> <p><b>GOAL:</b> To evaluate effects on workplace outcomes.</p> <ul style="list-style-type: none"> <li>12 months</li> <li>Care managers given 12 hrs of training; 60 min weekly supervision; caseload = 50-70 participants.</li> <li>For participants with significant depression, care managers recommended in-person psychotherapy &amp; medication evaluation (via telephone).</li> <li>For those declining in-person treatment, care managers maintained regular telephone contact, frequency determined by need. Those with significant symptoms after 2 months were offered an 8-session cognitive behavioural psychotherapy program.</li> <li>All participants were mailed a psychoeducational workbook.</li> <li>Psychiatrist available to care managers if needed.</li> </ul> | <p><b>DELIVERY METHOD:</b> licensed master's degree-level mental health clinicians (care managers)</p> <p><b>SUBJECTS SCREENED?</b> yes</p> <p><b>TAILORED?</b> yes</p> <p><b>INCENTIVES?</b> no</p> |
